# Supplementary material for: Commercially Available Outbred Mice for Genome-Wide Association Studies
Source: PLOS journal article supplement (doi:10.1371/journal.pgen.1001085), 2010-09-02

**Aai:ICR-US**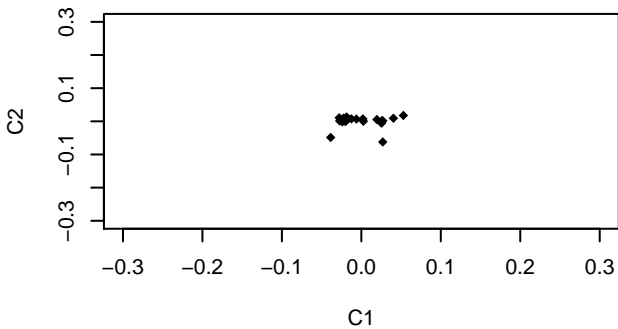**BK:W-UK**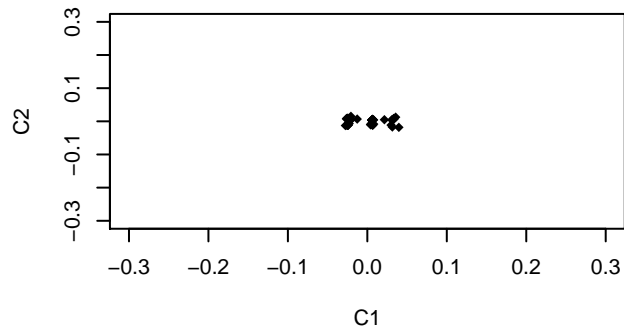**BomTac:NMRI-DK-151**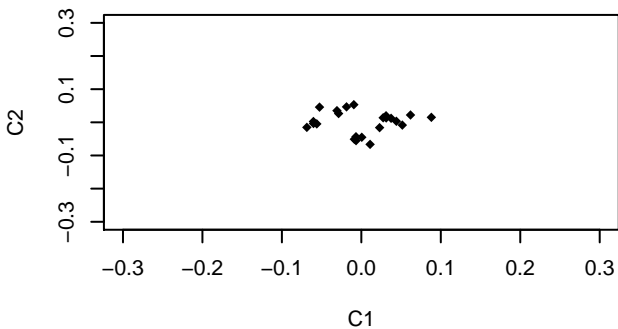**BomTac:NMRI-DK-160**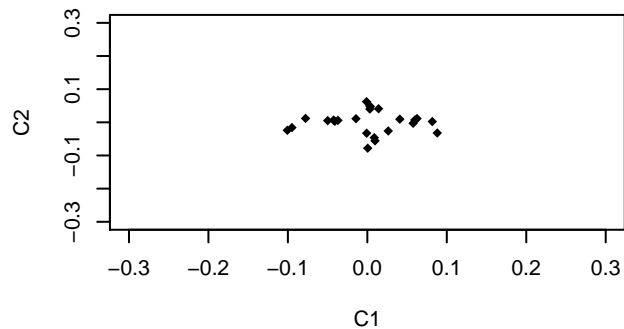**CC**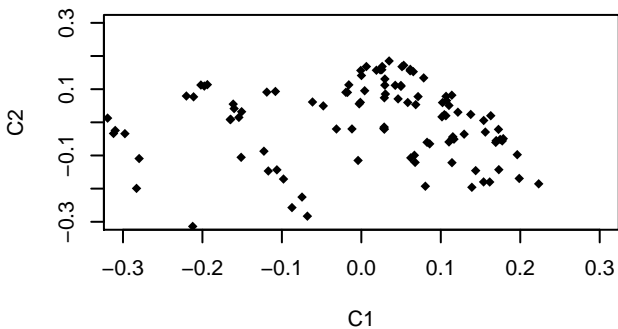**CirHi:CD1-IL**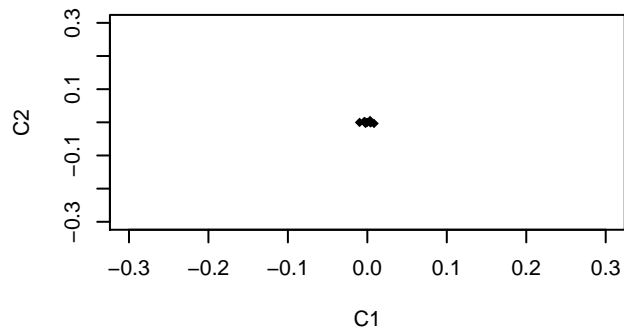

**CrI:CD1(ICR)-DE**

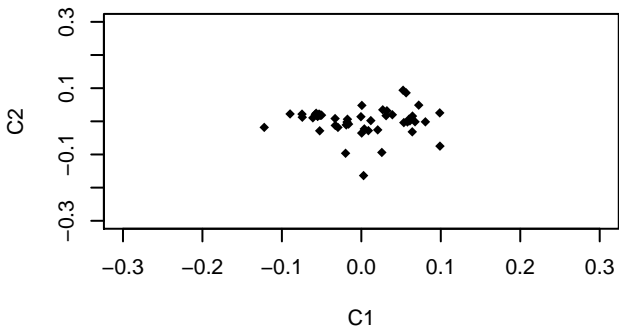

**CrI:CD1(ICR)-FR**

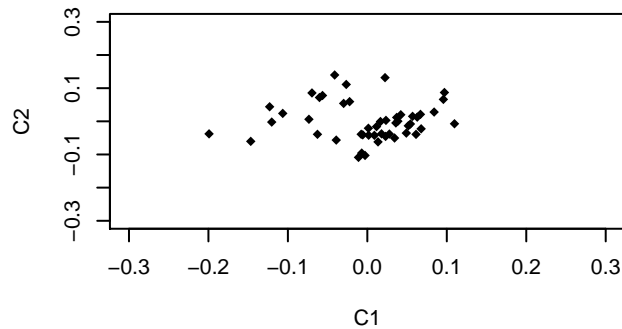

**CrI:CD1(ICR)-IT**

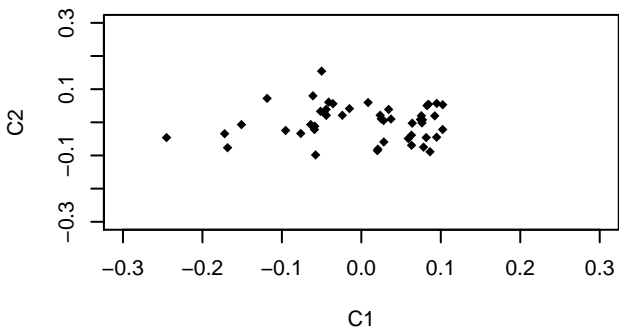

**CrI:CD1(ICR)-UK**

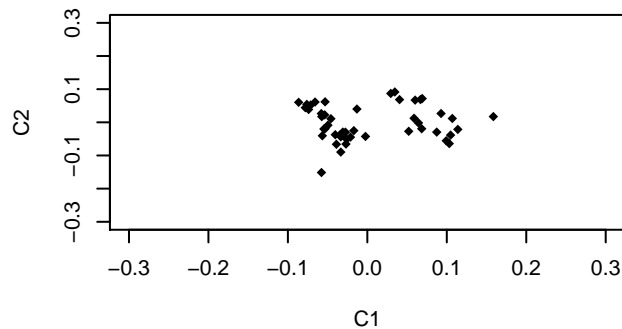

**CrI:CD1(ICR)-US\_C61**

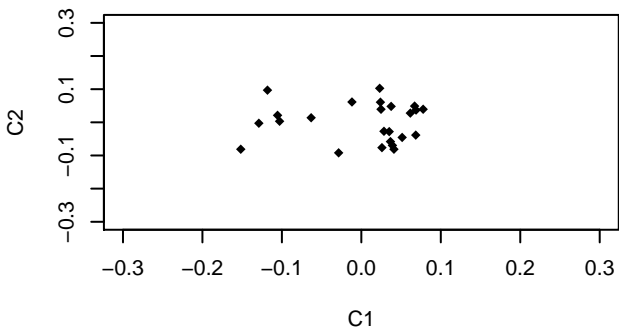

**CrI:CD1(ICR)-US\_H43**

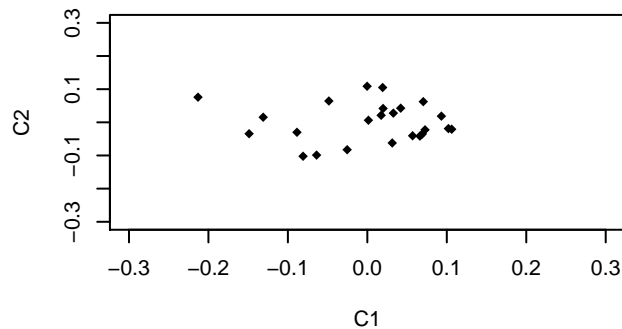

**CrI:CD1(ICR)-US\_H48**

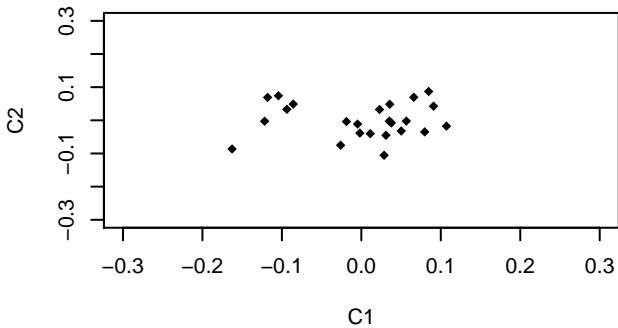

**CrI:CD1(ICR)-US\_K64**

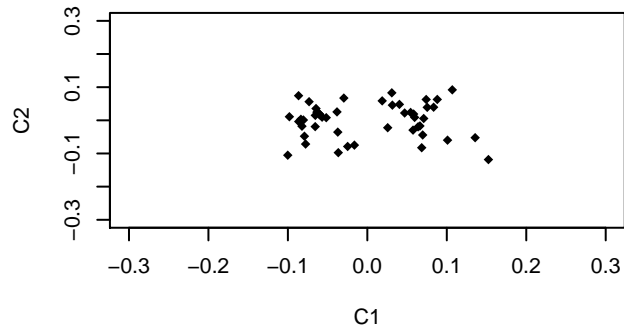

**CrI:CD1(ICR)-US\_K95**

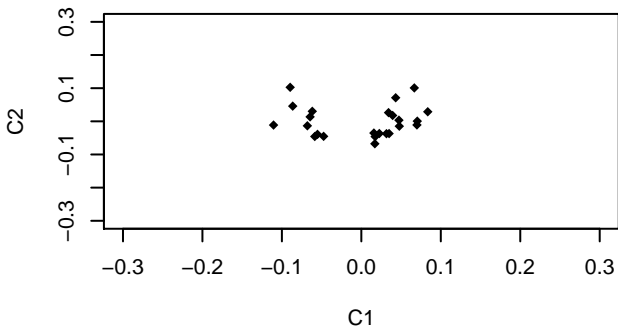

**CrI:CD1(ICR)-US\_P10**

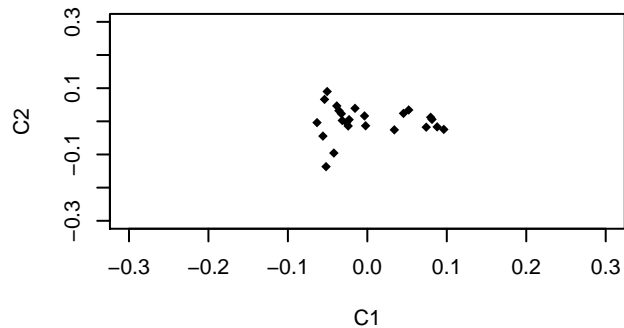

**CrI:CD1(ICR)-US\_R16**

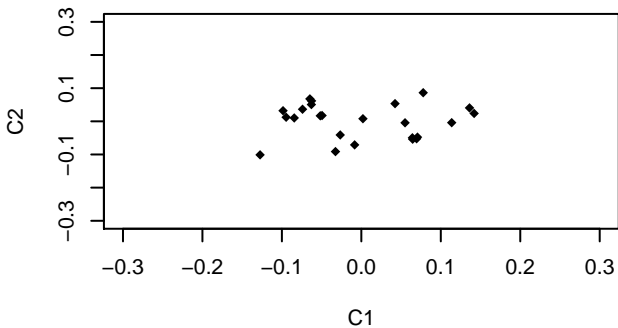

**CrI:CF1-US**

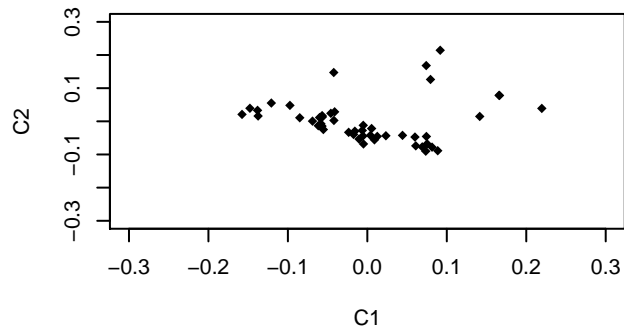

**CrI:CFW(SW)–US\_K71**

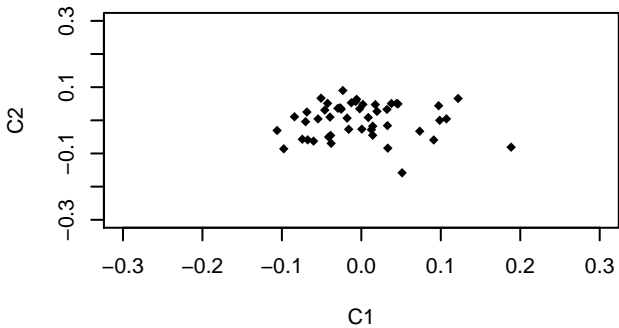

**CrI:CFW(SW)–US\_P08**

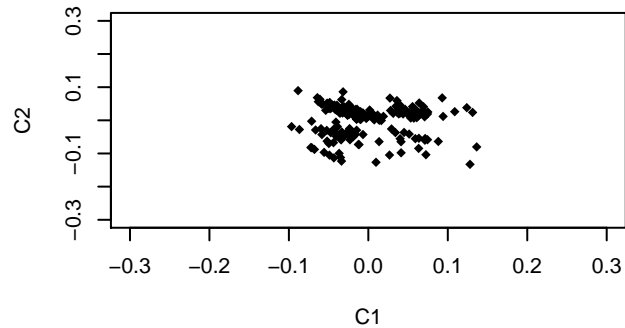

**CrI:MF1–UK**

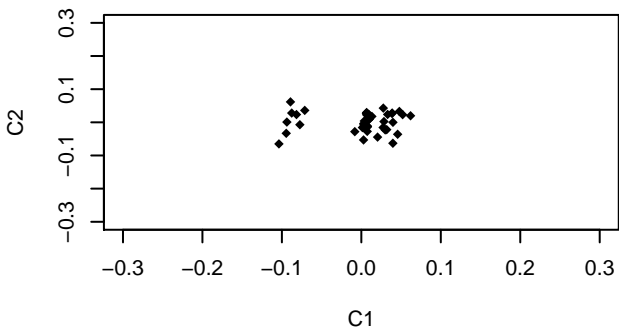

**CrI:NMRI(Han)–DE**

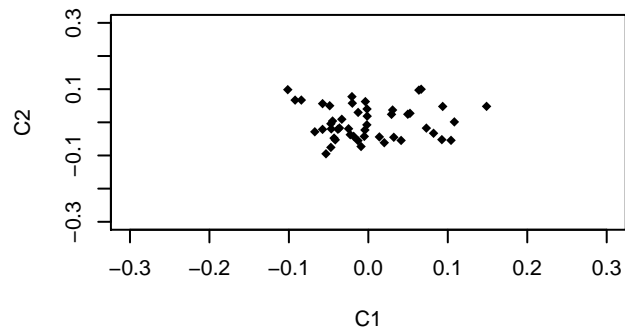

**CrI:NMRI(Han)–FR**

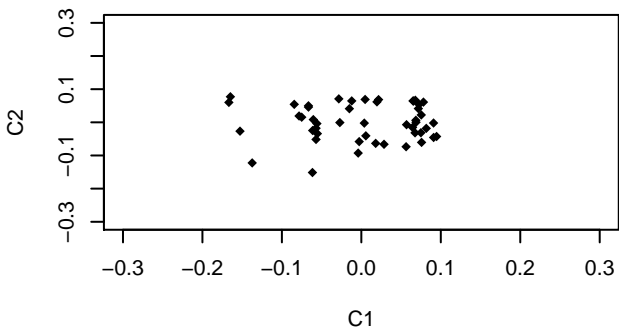

**CrI:NMRI(Han)–HU**

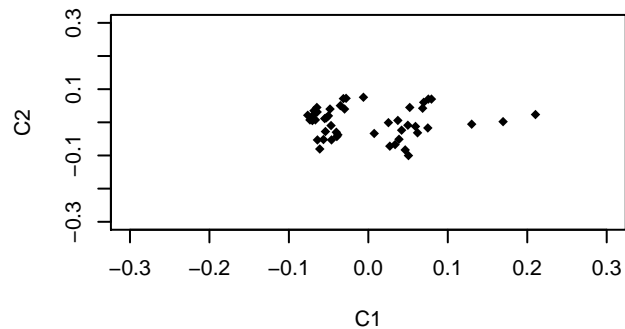

**Crl:OF1-FR\_B22**

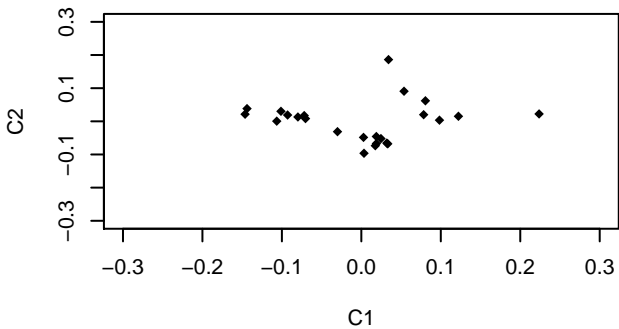

**Crl:OF1-FR\_B41**

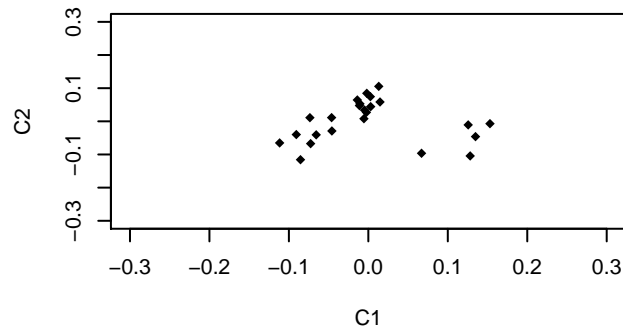

**Crl:OF1-HU**

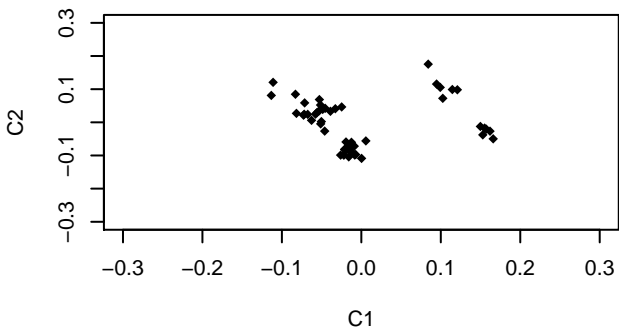

**Crlj:CD1(ICR)-JP**

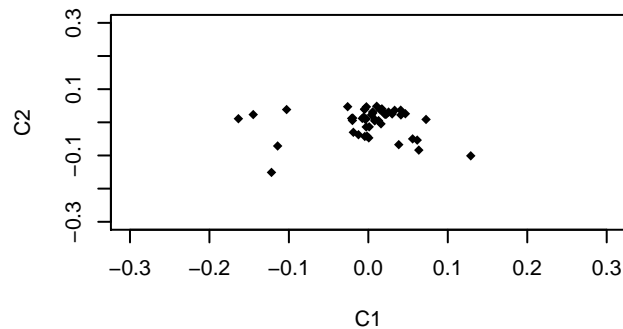

**HS**

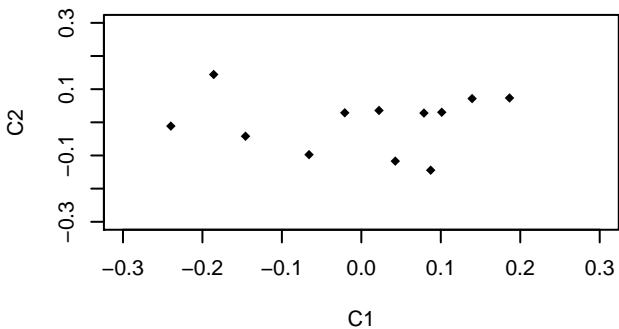

**HanRcc:NMRI-CH**

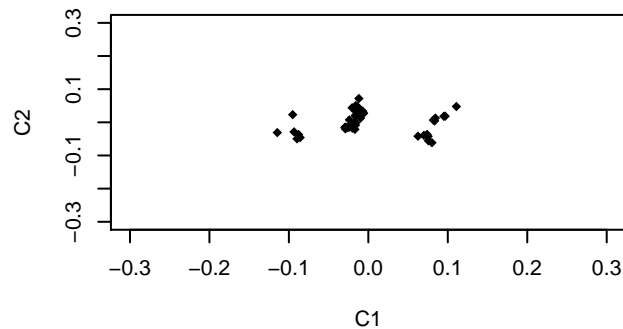

**Hla:ICR(CVF)-US**

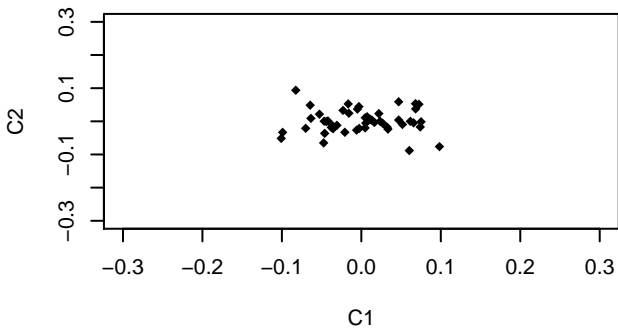

**Hsd:ICR(CD-1)-DE**

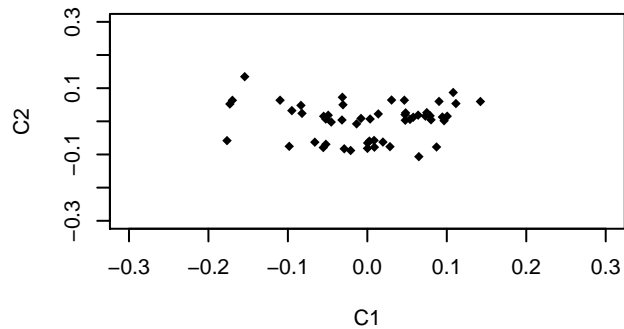

**Hsd:ICR(CD-1)-ES**

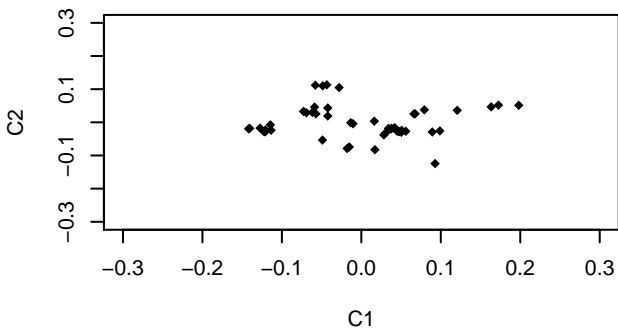

**Hsd:ICR(CD-1)-FR**

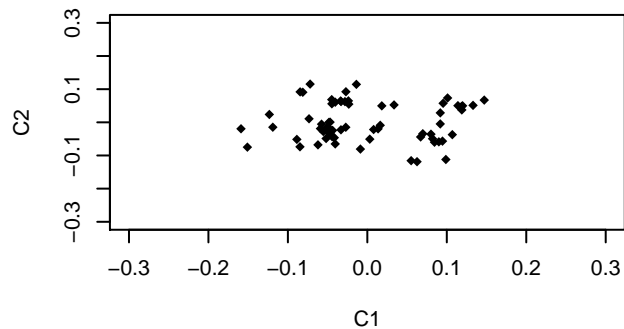

**Hsd:ICR(CD-1)-IL**

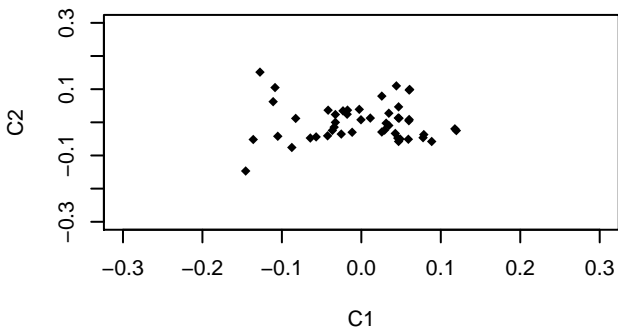

**Hsd:ICR(CD-1)-IT**

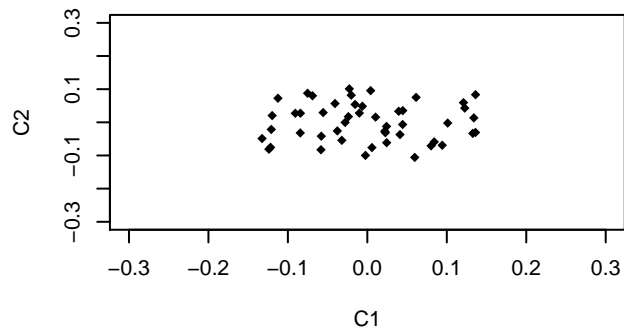

**Hsd:ICR(CD-1)-MX**

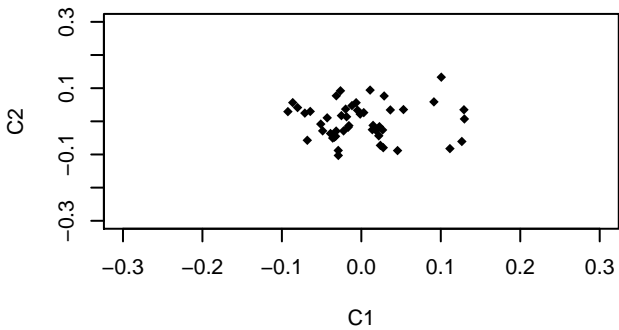

**Hsd:ICR(CD-1)-UK**

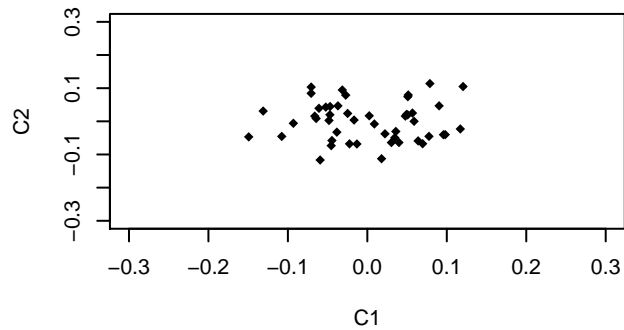

**Hsd:ICR(CD-1)-US**

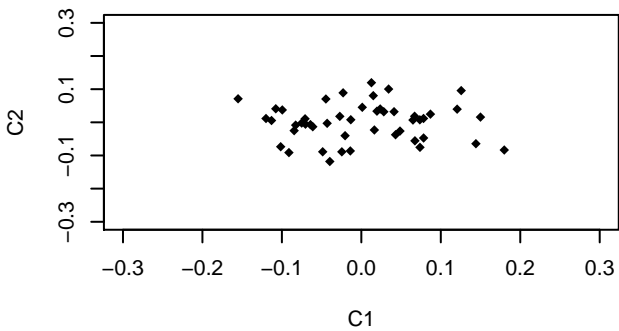

**Hsd:ND4-US**

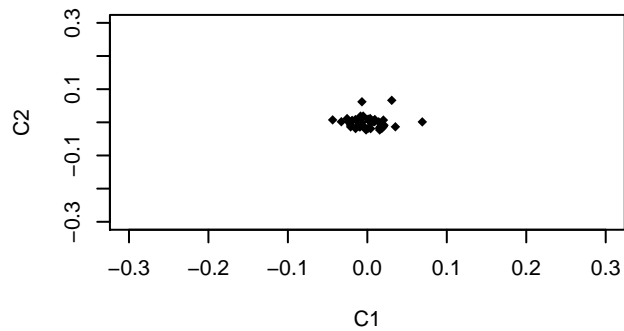

**Hsd:NIHS-UK\_C**

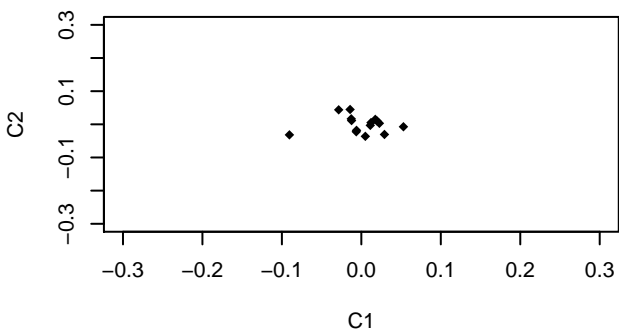

**Hsd:NIHS-UK\_G**

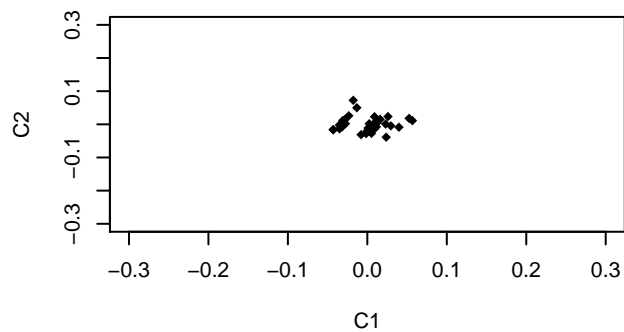

**Hsd:NIHS-US**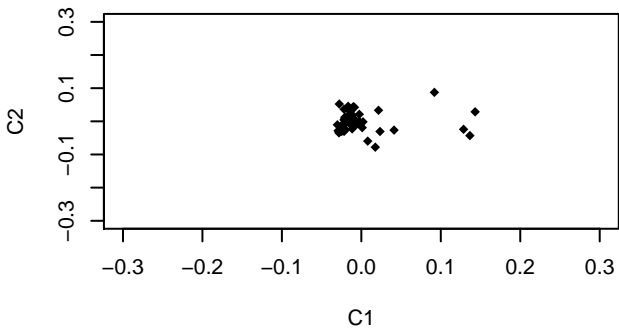**Hsd:NIHSBC-IL**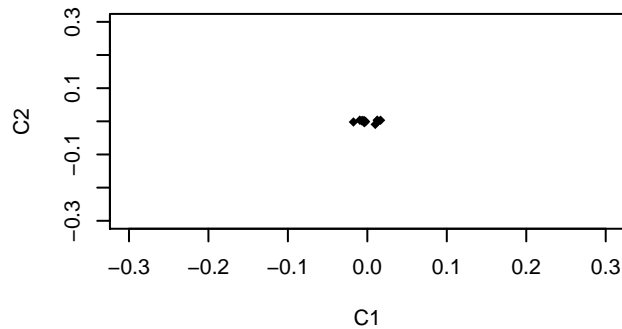**Hsd:NSA(CF1)-US**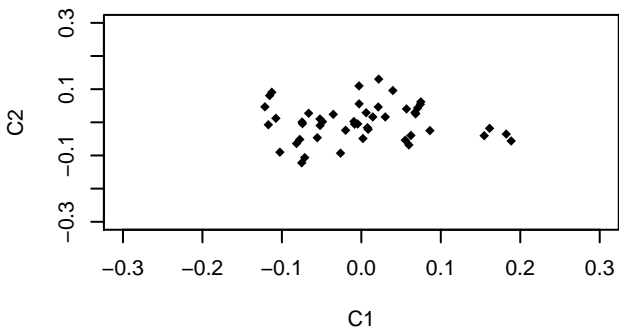**HsdHu:SABRA-IL**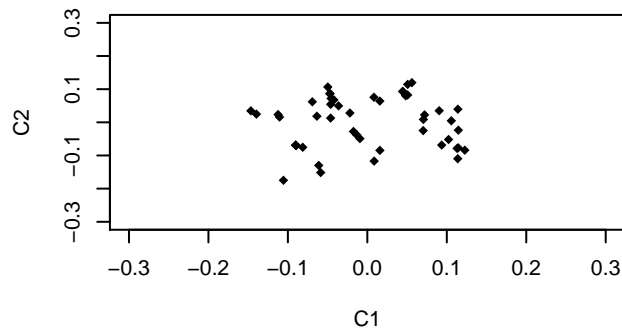**Hsdlco:OF1-IT**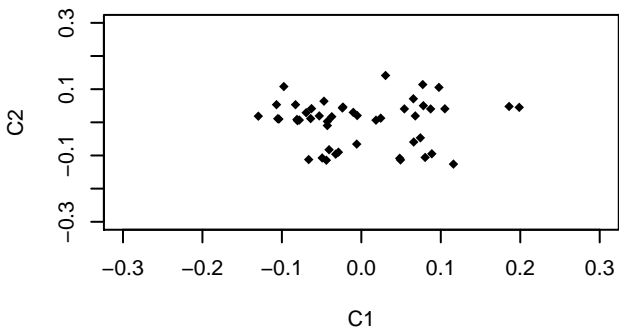**HsdOla:MF1-IL**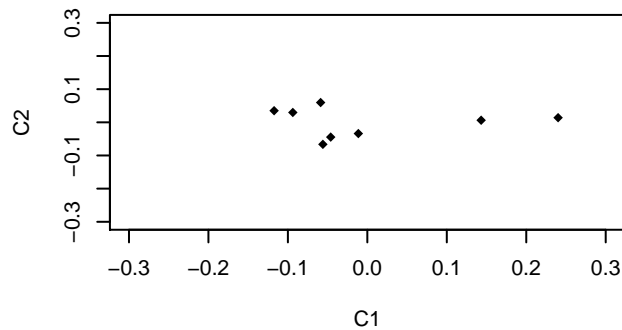



**HsdOla:MF1-UK\_C**

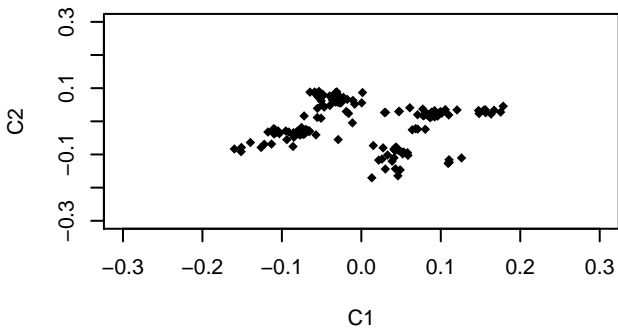

**HsdOla:MF1-UK\_G**

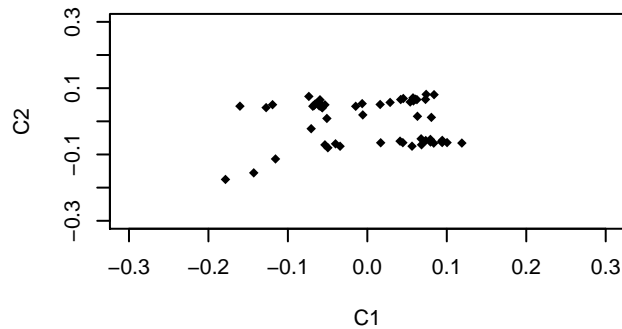

**HsdOla:MF1-US\_202A\_iso**

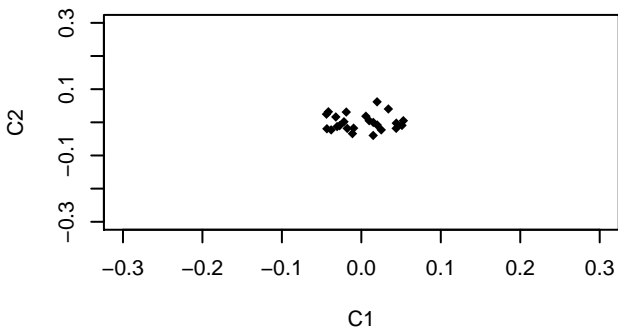

**HsdOla:MF1-US\_202A\_prod**

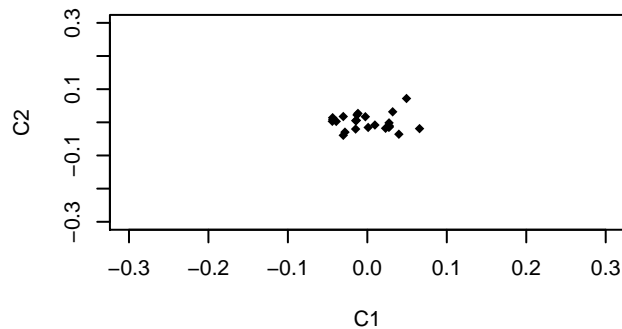

**HsdOla:TO-UK**

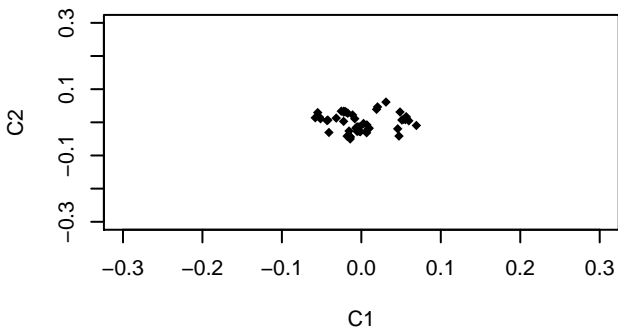

**HsdWin:CFW1-DE**

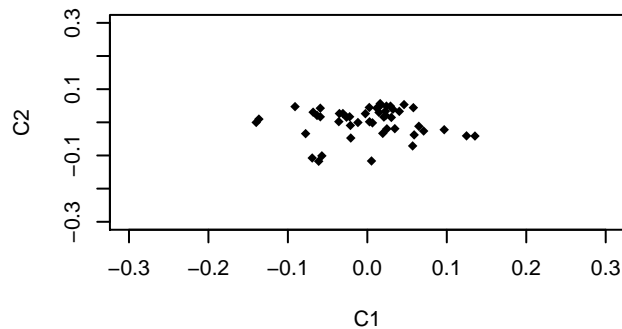

**HsdWin:CFW1-NL**

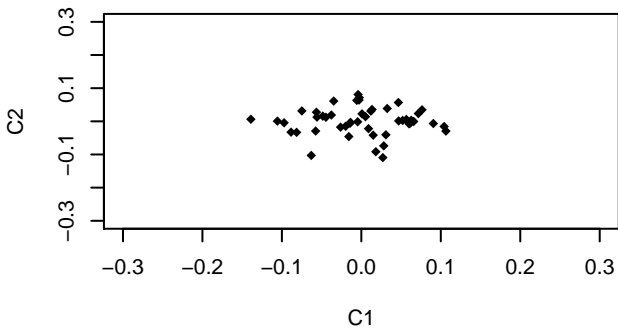

**HsdWin:NMRI-DE**

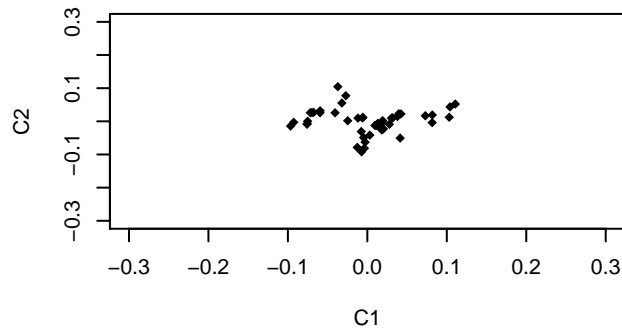

**HsdWin:NMRI-NL**

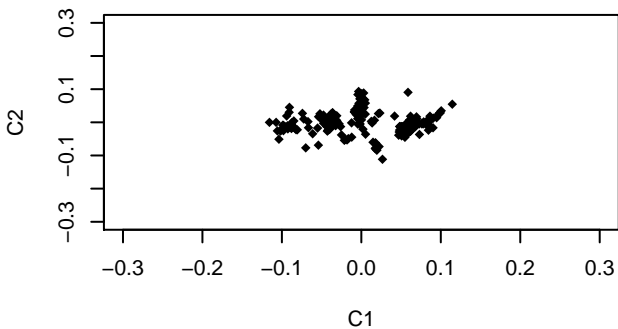

**HsdWin:NMRI-UK**

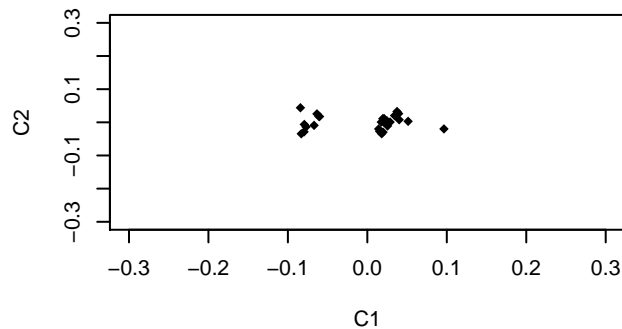

**IcrTac:ICR-US**

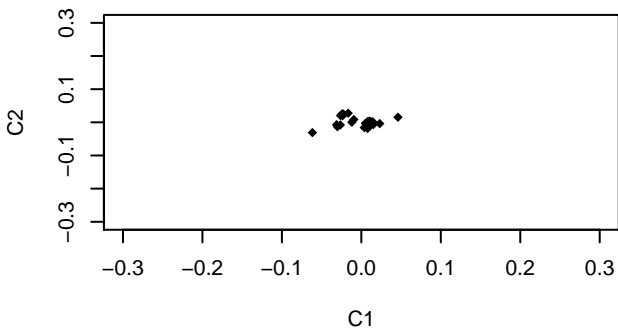

**Inbreds\_94\_strains**

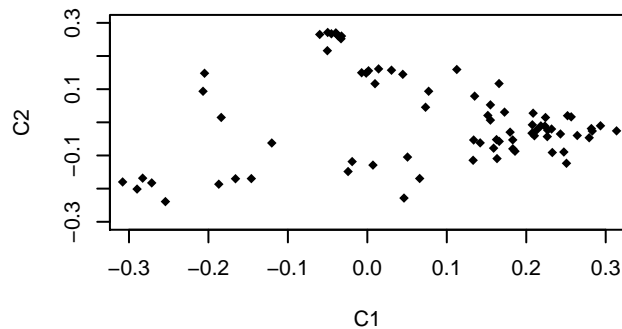

**NTac:NIHBS-US**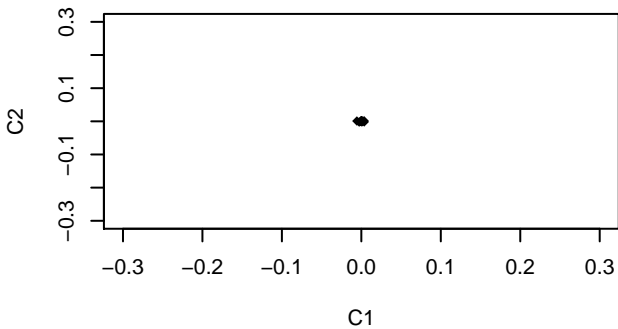**RjHan:NMRI-FR**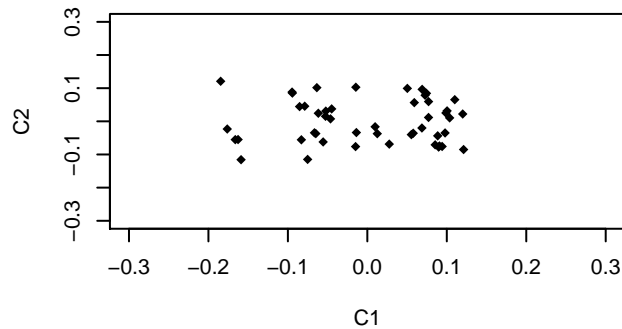**RjOri:Swiss-FR**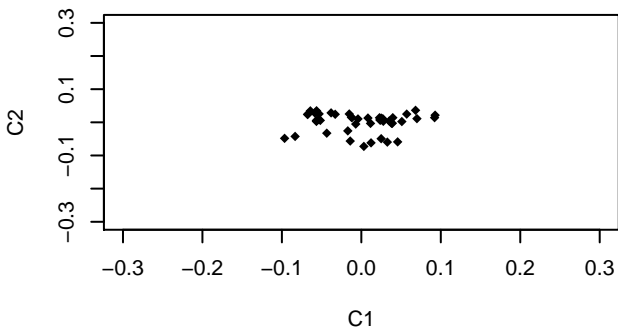**Sca:NMRI-SE-10an**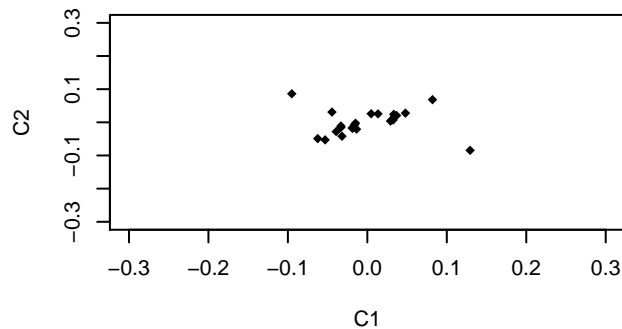**Sca:NMRI-SE\_22**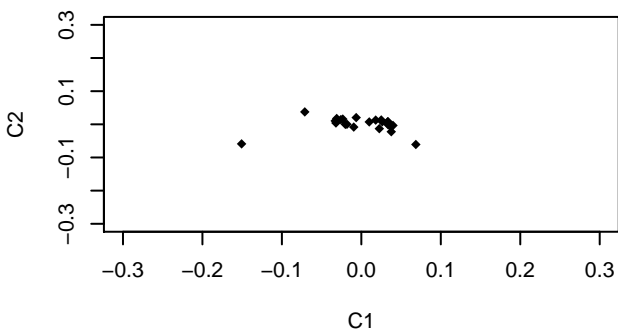**Sim:(SW)fBR-US\_A1**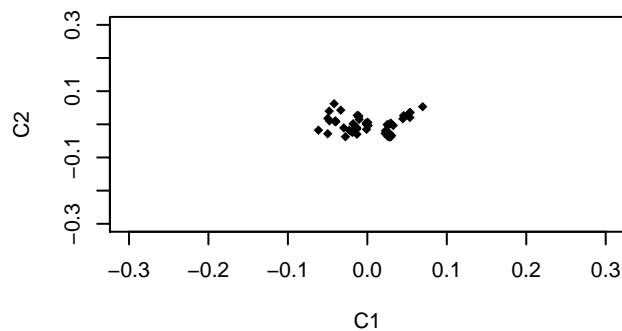

**Sim:(SW)fBR-US\_B1**

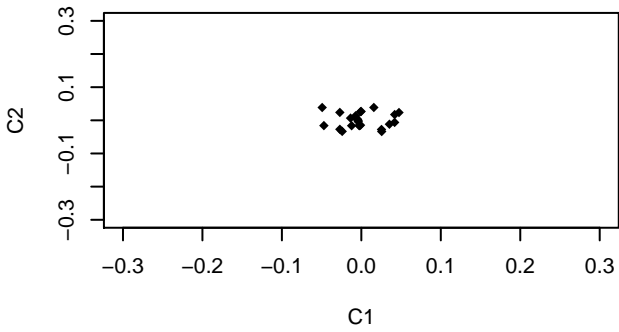

**Tac:SW-US**

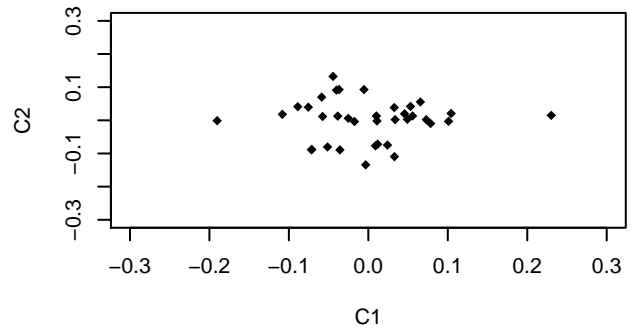

**Wild\_Arizona**

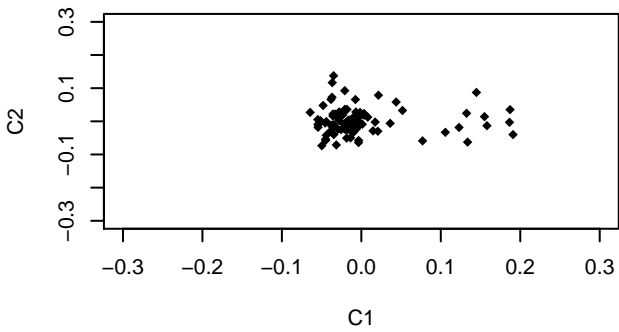

Supplement: S1 (10.1371/journal.pgen.1001085.s001) [file journal.pgen.1001085.s001]
